# Supplementary material for: Efficient reduction of nitro compounds and domino preparation of 1-substituted-1H-1,2,3,4-tetrazoles by Pd(ii)-polysalophen coated magnetite NPs as a robust versatile nanocomposite
Source: Royal Society of Chemistry journal article supplement (doi:10.1039/d1ra01164b), 2021-01-01
Supplement: d1ra01164b1.pdf [file d1ra01164b1.pdf]

## Supplementary materials

### Efficient reduction of nitro compounds and domino preparation of 1-substituted-1*H*-1,2,3,4-tetrazoles by Pd(II)-polysalophen coated magnetite NPs as a robust versatile nanocomposite

DaPeng Xu,<sup>a</sup> Meilu Xiong,<sup>b\*</sup> Milad Kazemnejadi,<sup>\*c</sup>

<sup>a</sup> Institute of Chemical Technology, Gansu Industry Polytechnic College, TianShui 741000, China  
Public Foundation College, Gansu Health Vocational College, Lanzhou 730207, China

<sup>b</sup> Department of Chemistry, Faculty of Sciences, University of Birjand, Birjand, Iran.

\*Corresponding: Email: [bearbabyx@sina.com](mailto:bearbabyx@sina.com) (Meilu Xiong); [miladkazemnejad@yahoo.com](mailto:miladkazemnejad@yahoo.com) (Milad Kazemnejadi)

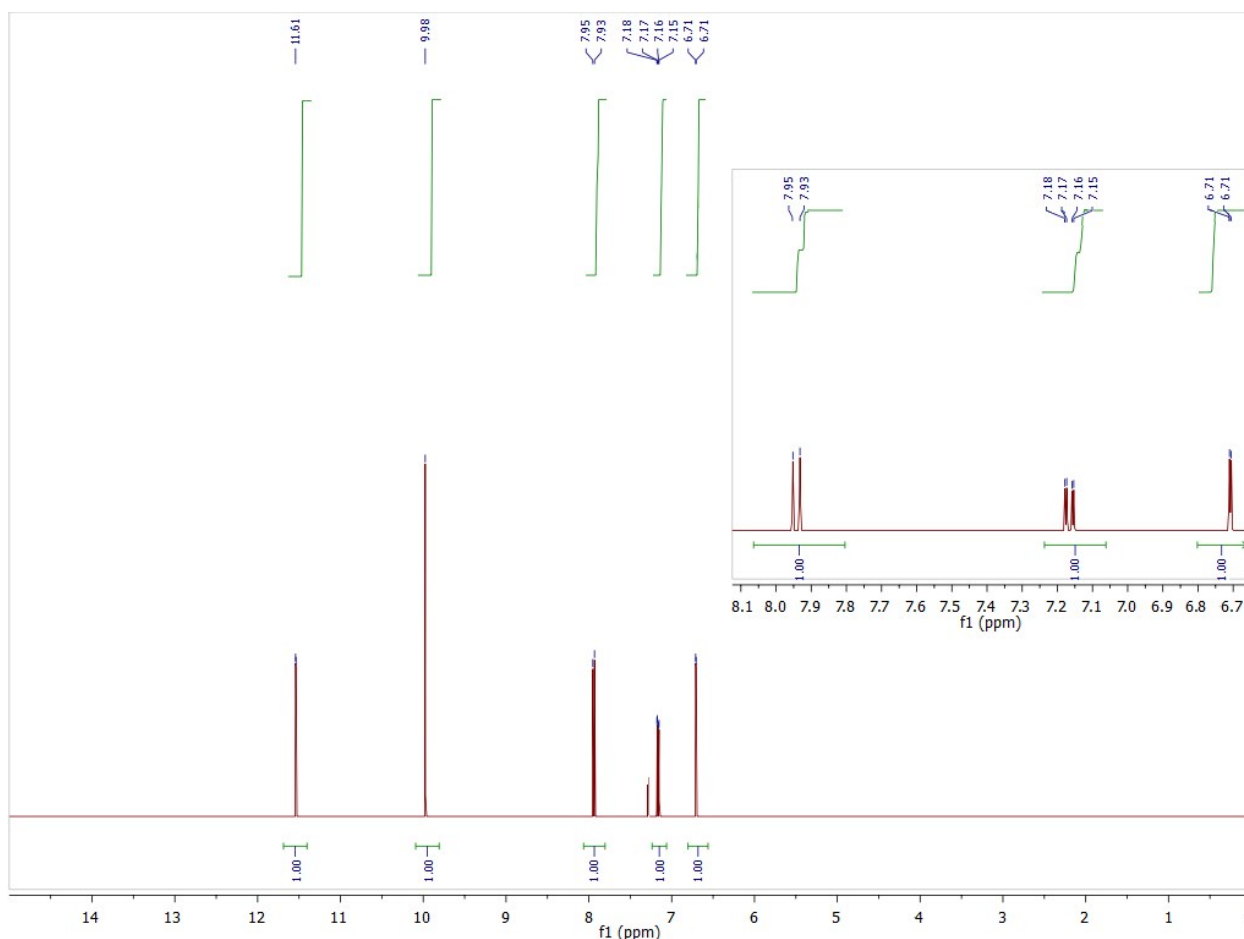

Fig. S1 <sup>1</sup>H-NMR spectrum of TCT(SA)<sub>3</sub> (3) (CDCl<sub>3</sub>, 400 MHz)

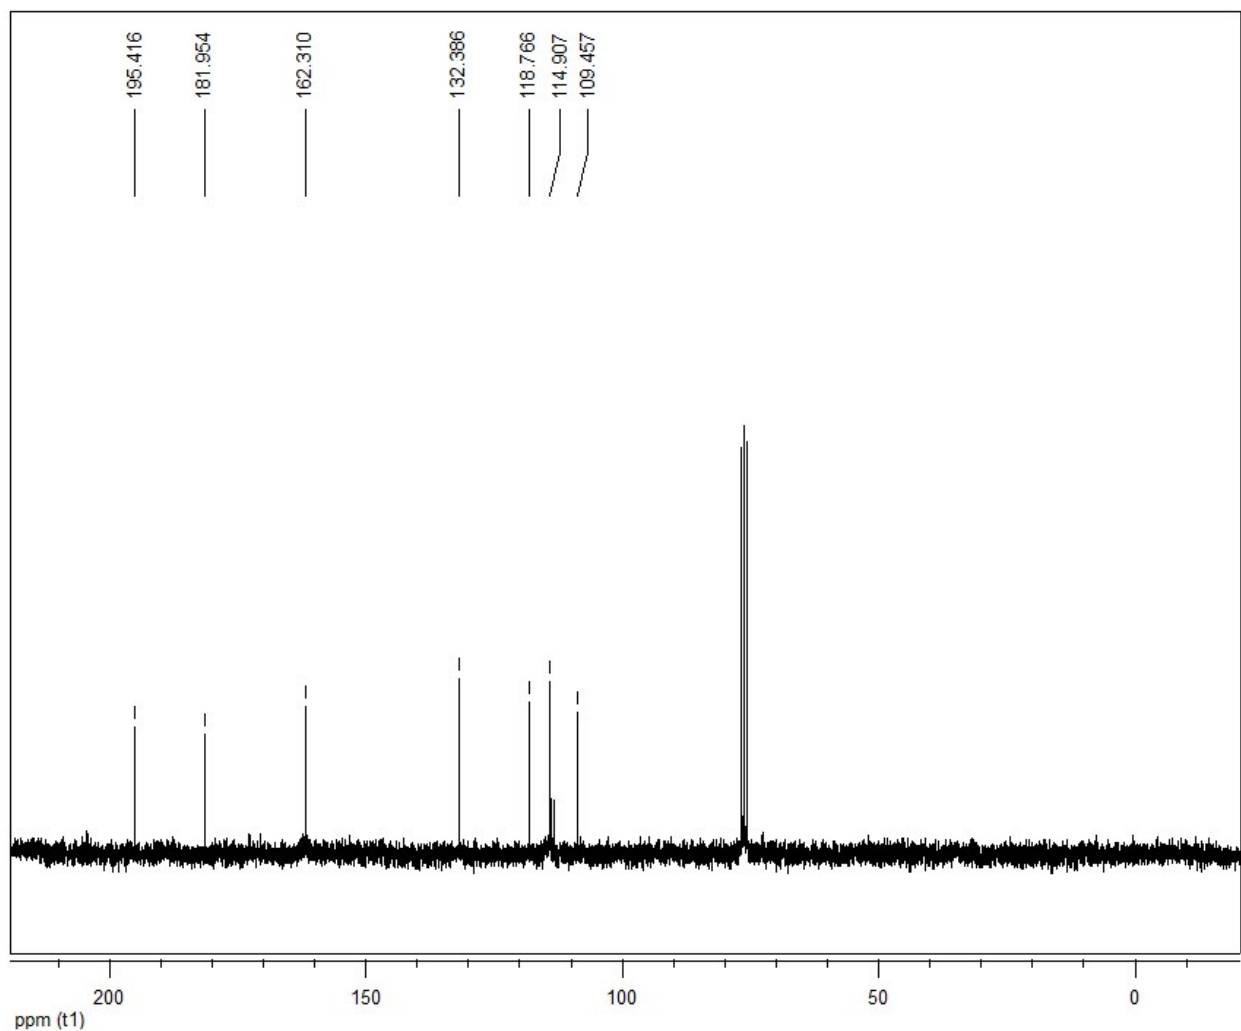

**Fig. S2**  $^{13}\text{C}$ -NMR spectrum of TCT(SA)<sub>3</sub> (**3**) ( $\text{CDCl}_3$ , 100 MHz)

**Table S1** Determination of Pd content and mean diameter in Cat. **9** with different Pd loading amounts

| Entry | Cat. <b>9</b> / Pd (wt%) |                        | Mean diameter (nm) <sup>a</sup> |
|-------|--------------------------|------------------------|---------------------------------|
|       | ICP analysis             | EDX (mean of 5 points) |                                 |
| 1     | 2.22                     | 1.54                   | 82                              |
| 2     | 6.06                     | 5.90                   | 85                              |
| 3     | 10.11                    | 9.90                   | 82                              |
| 4     | 14.16                    | 13.98                  | 90                              |
| 5     | 18.19                    | 18.01                  | 94                              |

<sup>a</sup> DLS analysis

**Table S2** Reduction of nitroarens and domino preparation of 1-substituted-1*H*-1,2,3,4-tetrazoles catalyzed by  $\text{Fe}_3\text{O}_4@\text{SiO}_2@\text{polysalophen-Pd(II)}$  **9** with various Pd content.

| Entry | Catalyst <b>9</b> | Product                |                        |                        |
|-------|-------------------|------------------------|------------------------|------------------------|
|       |                   | <b>7a</b> <sup>a</sup> | <b>8a</b> <sup>b</sup> | <b>8a</b> <sup>c</sup> |

|   |                             | Time<br>(min) | Yield<br>(%) | Time<br>(min) | Yield<br>(%) | Time<br>(min) | Yield<br>(%) |
|---|-----------------------------|---------------|--------------|---------------|--------------|---------------|--------------|
| 1 | Cat. <b>9</b> / 0.12 mol%Pd | 60            | 33           | 75            | 22           | 90            | 15           |
| 2 | Cat. <b>9</b> / 0.3 mol%Pd  | 60            | 72           | 75            | 60           | 90            | 50           |
| 3 | Cat. <b>9</b> / 0.6 mol%Pd  | 60            | 96           | 75            | 97           | 90            | 98           |
| 4 | Cat. <b>9</b> / 0.8 mol%Pd  | 60            | 98           | 75            | 97           | 90            | 98           |
| 5 | Cat. <b>9</b> / 1.0 mol%Pd  | 60            | 95           | 75            | 92           | 90            | 90           |

<sup>a</sup> Nitroarene (1.0 mmol), NaBH<sub>4</sub> (2.0 mmol), H<sub>2</sub>O (2.0 mL), catalyst **9** (5 mg), reflux.

<sup>b</sup> Aniline (1.0 mmol), triethyl orthoformate (1.2 mmol), catalyst **9** (5 mg), H<sub>2</sub>O (2.0 mL), reflux.

<sup>c</sup> Nitrobenzene (1.0 mmol), triethyl orthoformate (1.2 mmol), NaN<sub>3</sub> (1.5 mmol), NaBH<sub>4</sub> (2.0 mmol), H<sub>2</sub>O (2.0 mL), catalyst **9** (5 mg), reflux.

## Characterization data for 12a-12h

### 1-Phenyl-1*H*-Tetrazole (Table 3, 12a)

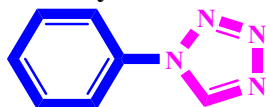

White solid; m.p. 64-45 °C [1]; <sup>1</sup>H NMR (250 MHz, CDCl<sub>3</sub>) δ(ppm)= 6.87-7.05 (m, 5H), 8.20 (s, 1H); <sup>13</sup>C NMR (62.9 MHz, CDCl<sub>3</sub>) δ(ppm)= 129.5, 130.1, 134.2, 135.0; CHN: Found %: C 57.52; H 4.10; N 38.39. C<sub>7</sub>H<sub>6</sub>N<sub>4</sub>. Calculated, %: C 57.53; H 4.14; N 38.34.

### 1-(4-Methoxyphenyl)-1*H*-Tetrazole (Table 3, 12b)

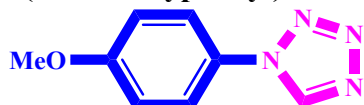

White solid; m.p. 114-115 °C [1]; <sup>1</sup>H NMR (250 MHz, CDCl<sub>3</sub>) δ(ppm)= 3.72 (s, 3H), 6.72 (d, *J*= 8.00 Hz, 2H), 7.19 (d, *J*= 8.00 Hz, 2H), 8.27 (s, 1H); <sup>13</sup>C NMR (62.9 MHz, CDCl<sub>3</sub>) δ(ppm)= 57.8, 115.4, 123.6, 128.4, 133.6, 150.6; CHN: Found %: C 54.52; H 4.60; N 31.81. C<sub>8</sub>H<sub>8</sub>N<sub>4</sub>O. Calculated, %: C 54.54; H 4.58; N 31.80.

### 1-(4-Phenol)-1*H*-Tetrazole (Table 3, 12c)

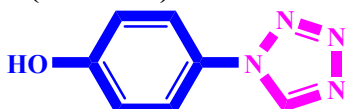

White solid; mp 185-187 °C [1,2]; <sup>1</sup>H NMR (250 MHz, DMSO-*d*<sub>6</sub>) δ(ppm)= 6.97-7.00 (d, *J*= 9 Hz, 2 H), 7.6-7.7 (d, *J*= 9 Hz, 2 H), 9.94 (s, 1 H), 10.15 (s, 1H); <sup>13</sup>C NMR (62.9 MHz, DMSO-*d*<sub>6</sub>) δ(ppm)= 116.6, 123.5, 125.9, 142.5, 159.0; CHN: Found %: C 51.87; H 3.76; N 34.50. C<sub>7</sub>H<sub>6</sub>N<sub>4</sub>O. Calculated, %: C 51.85; H 3.73; N 34.55.

### 1-*p*-Tolyl-1*H*-Tetrazole (Table 3, 12d)

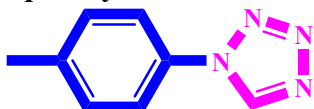

White solid (91% yield); m.p. 94-96 °C [1,3]; <sup>1</sup>H NMR (250 MHz, CDCl<sub>3</sub>) δ(ppm)= 2.87 (s, 3H), 6.73 (d, *J*= 8.50 Hz, 2H), 7.15 (d, *J*= 8.50 Hz, 2H), 8.27 (s, 1H); <sup>13</sup>C NMR (62.9 MHz, CDCl<sub>3</sub>) δ(ppm)= 23.8, 116.7, 124.9, 127.5, 133.6, 145.4; CHN: Found %: C 59.93; H 3.505; N 35.02. C<sub>8</sub>H<sub>8</sub>N<sub>4</sub>. Calculated, %: C 59.99; H 5.03; N 34.98.

### 1-(4-Chlorophenyl)-1*H*-Tetrazole (Table 3, 12e)

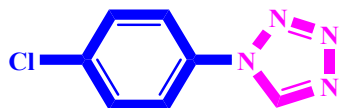

White crystal; m.p. 157 °C [3,4];  $^1\text{H}$  NMR (250 MHz,  $\text{CDCl}_3$ )  $\delta(\text{ppm})= 7.30$  (d,  $J= 9.0$  Hz, 2H), 7.51 (d,  $J= 9.6$  Hz, 2H), 8.36 (s, 1H);  $^{13}\text{C}$  NMR (62.9 MHz,  $\text{CDCl}_3$ )  $\delta(\text{ppm})= 117.7, 119.1, 123.7, 129.5, 135.8$ ; CHN: Found %: C 46.55; H 2.77; N 31.06.  $\text{C}_7\text{H}_5\text{ClN}_4$ . Calculated, %: C 46.56; H 2.79; N 31.02.

### 1-(4-Benzonitrile)-1H-Tetrazole (Table 3, 12f)

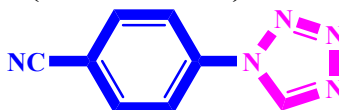

White solid; m.p. 177-179°C [1,2];  $^1\text{H}$  NMR (250 MHz,  $\text{CDCl}_3$ )  $\delta(\text{ppm})= 7.25$  (d,  $J= 5.75$  Hz, 2H), 7.32 (d,  $J= 5.7$  Hz, 2H), 8.26 (s, 1H);  $^{13}\text{C}$  NMR (62.9 MHz,  $\text{CDCl}_3$ )  $\delta(\text{ppm})= 112.3, 118.2, 122.7, 132.8, 137.4, 140.4$ ; CHN: Found %: C 56.17; H 2.97; N 40.86.  $\text{C}_8\text{H}_5\text{N}_5$ . Calculated, %: C 56.14; H 2.94; N 40.92.

### 2-(1H-tetrazol-1-yl) pyridine (Table 3, 12g)

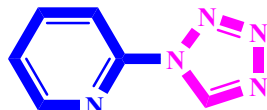

White solid; mp 80-82 °C [18];  $^1\text{H}$  NMR (250 MHz,  $\text{CDCl}_3$ )  $\delta(\text{ppm})= 7.50$ -7.45 (m, 1 H), 8.05-7.99 (m, 1 H), 8.12-8.09 (d,  $J= 9$  Hz, 1 H), 8.57-8.55 (q,  $J= 2.3$ Hz, 1 H), 9.57 (s, 1 H);  $^{13}\text{C}$  NMR (62.9 MHz,  $\text{CDCl}_3$ )  $\delta(\text{ppm})= 114.4, 124.8, 139.8, 140.1, 146.9, 149.0$ ; CHN: Found %: C 49.01; H 2.45; N 46.55.  $\text{C}_6\text{H}_5\text{N}_5$ . Calculated, %: C 48.98; H 3.43; N 47.60.

### 1-(3-Nitrobenzene)-1H-Tetrazole (Table 3, 12h)

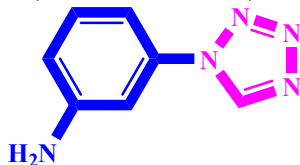

White solid; m.p. 106-108 °C [2,4];  $^1\text{H}$  NMR (250 MHz,  $\text{CDCl}_3$ )  $\delta(\text{ppm})= 7.41$ -7.48 (m, 1 H), 7.90 (d, 1 H,  $J= 9.5$  Hz), 8.02 (d, 1 H,  $J= 9.5$  Hz), 8.40 (s, 1 H), 8.53 (s, 1 H);  $^{13}\text{C}$  NMR (62.9 MHz,  $\text{CDCl}_3$ )  $\delta(\text{ppm})= 114.4, 118.6, 125.5, 129.7, 130.4, 139.1, 149.8$ ; CHN: Found %: C 52.19; H 4.41; N 43.40.  $\text{C}_7\text{H}_7\text{N}_5$ . Calculated, %: C 52.17; H 4.38; N 43.45.

## References

- [1] Habibi, D., Pakravan, N., Arabi, A., & Kaboudvand, Z. (2018). Preparation of  $\text{Fe}_3\text{O}_4@ 5, 10$ -dihydropyrido [2, 3-b] quinoxaline-7, 8-diol copper complex: A capable nanocatalyst for the green synthesis of 1-substituted 1H-tetrazoles. *Applied Organometallic Chemistry*, 32(1), e3988.
- [2] Aridoss, G., & Laali, K. K. (2011). Building Heterocyclic Systems with  $\text{RC}(\text{OR})_2^+$  Carbocations in Recyclable Brønsted Acidic Ionic Liquids: Facile Synthesis of 1-Substituted

- 1*H*-1, 2, 3, 4-Tetrazoles, Benzazoles and Other Ring Systems with CH(OEt)<sub>3</sub> and EtC(OEt)<sub>3</sub> in [EtNH<sub>3</sub>][NO<sub>3</sub>] and [PMIM (SO<sub>3</sub>H)][OTf]. *European Journal of Organic Chemistry*, 2011(15), 2827-2835.
- [3] Sharghi, H., Ebrahimpourmoghaddam, S., & Doroodmand, M. M. (2013). Facile synthesis of 5-substituted-1*H*-tetrazoles and 1-substituted-1*H*-tetrazoles catalyzed by recyclable 4'-phenyl-2, 2': 6', 2''-terpyridine copper (II) complex immobilized onto activated multi-walled carbon nanotubes. *Journal of Organometallic Chemistry*, 738, 41-48.
- [4] Ghasemzadeh, M. S., & Akhlaghinia, B. (2017). 2-Aminoethanesulfonic Acid Immobilized on Epichlorohydrin Functionalized Fe<sub>3</sub>O<sub>4</sub>@WO<sub>3</sub> (Fe<sub>3</sub>O<sub>4</sub>@WO<sub>3</sub>-EAE-SO<sub>3</sub>H): A Novel Magnetically Recyclable Heterogeneous Nanocatalyst for the Green One-Pot Synthesis of 1-Substituted-1 *H*-1, 2, 3, 4-Tetrazoles in Water. *Bulletin of the Chemical Society of Japan*, 90(10), 1119-1128.
